# Supplementary material for: Four cobalt(ii) complexes based on a new tricarboxylate with a naphthalene ring and different N-containing ligands: synthesis, crystal structures and magnetic properties
Source: Royal Society of Chemistry journal article supplement (doi:10.1039/c6nj00065g), 2016-01-01
Supplement: c6nj00065g1.pdf [file c6nj00065g1.pdf]

**Four cobalt(II) complexes based on a new tricarboxylate with naphthalene ring and different N-containing ligands: synthesis, crystal structures and magnetic properties**

Yan Fan,<sup>a</sup> Dong-Chen Hu,<sup>a</sup> Xiao-Qiang Yao,<sup>a</sup> Yun-Xia Yang<sup>a</sup> and Jia-Cheng Liu<sup>\*ab</sup>

New Journal of Chemistry

Table S1 The selected bond lengths (Å) and angles (°) for complexes **1 - 4**.

Complex **1** Symmetry code for #1 x, y, 1+z ; #2 -x, 1-y, 2-z; #3 -x, 2-y, 3-z; #4 -x, 1-y, 1-z; #5 x, 1+y, 2+z

| <b>Bond Distance</b> |           |                 |           |            |          |
|----------------------|-----------|-----------------|-----------|------------|----------|
| Co1#1-O1#1           | 2.090(2)  | Co1#1-O2#2      | 2.087(2)  | Co1#1-O5   | 2.125(2) |
| Co1#1-O6             | 2.099(2)  | Co1#1-N1#1      | 2.106(2)  | Co1#1-N5#1 | 2.143(2) |
| Co2#5-O4             | 2.166(6)  | Co2#5-O4#3      | 2.166(6)  | Co2#5-O8#4 | 2.057(2) |
| Co2#5-O8#5           | 2.057(2)  | Co2#5-N4#4      | 2.134(2)  | Co2#5-N4#5 | 2.134(2) |
| <b>Bond Angles</b>   |           |                 |           |            |          |
| O1#1-Co1#1-O2#2      | 105.62(9) | O1#1-Co1#1-O6   | 84.45(9)  |            |          |
| O1#1-Co1#1-N1#1      | 90.47(9)  | O1#1-Co1#1-N5#1 | 87.28(10) |            |          |
| O5-Co1#1-O2#2        | 85.98(9)  | O5-Co1#1-O6     | 83.52(9)  |            |          |
| O5-Co1#1-N1#1        | 94.27(8)  | O5-Co1#1-N5#1   | 89.07(9)  |            |          |
| N4#4-Co2#5-O4        | 88.94(8)  | N4#4-Co2#5-O4#3 | 91.06(8)  |            |          |
| N4#4-Co2#5-O8#4      | 91.28(9)  | N4#4-Co2#5-O8#5 | 88.72(9)  |            |          |
| N4#5-Co2#5-O4        | 91.06(8)  | N4#5-Co2#5-O4#3 | 88.94(8)  |            |          |
| N4#5-Co2#5-O8#4      | 88.72(10) | N4#5-Co2#5-O8#5 | 91.28(9)  |            |          |

Complex **2** Symmetry code for #1 0.5-x, y, 0.5-z

| <b>Bond Distance</b> |            |               |           |          |          |
|----------------------|------------|---------------|-----------|----------|----------|
| Co1-O1               | 2.198(3)   | Co2-O9        | 2.083(3)  | Co3-O1   | 2.168(3) |
| Co1-O1#1             | 2.198(3)   | Co2-O9#1      | 2.083(3)  | Co3-O1#1 | 2.168(3) |
| Co1-O2               | 2.243(3)   | Co2-O10       | 2.240(3)  | Co3-O5   | 2.072(3) |
| Co1-O2#1             | 2.243(3)   | Co2-O10#1     | 2.240(3)  | Co3-O5#1 | 2.072(3) |
| Co1-N5               | 2.004(3)   | Co2-N3        | 2.107(3)  | Co3-N1   | 2.077(3) |
| Co1-N5#1             | 2.004(3)   | Co2-N3#1      | 2.107(3)  | Co3-N1#1 | 2.077(3) |
| <b>Bond Angles</b>   |            |               |           |          |          |
| O2-Co1-O1            | 58.75(11)  | N3#1-Co2-O9#1 | 92.39(12) |          |          |
| O2-Co1-O1#1          | 110.97(10) | N3#1-Co2-O10  | 94.45(12) |          |          |

|               |            |                |           |
|---------------|------------|----------------|-----------|
| O2-Co1-N5     | 94.57(13)  | N3#1-Co2-O10#1 | 87.63(12) |
| O2-Co1-N5#1   | 109.7(2)   | N3#1-Co2-N3    | 91.73(19) |
| O2#1-Co1-O1   | 110.97(10) | O5-Co3-O1      | 84.25(11) |
| O2#1-Co1-O1#1 | 58.75(11)  | O5-Co3-O1#1    | 85.00(11) |
| O2#1-Co1-N5   | 92.25(13)  | O5-Co3-N1      | 95.40(13) |
| O2#1-Co1-N5#1 | 94.57(13)  | O5-Co3-N1#1    | 93.77(12) |
| O9-Co2-O9#1   | 83.50(16)  | O5#1-Co3-O1    | 84.99(11) |
| O9-Co2-O10    | 86.33(12)  | O5#1-Co3-O1#1  | 84.25(11) |
| O9-Co2-O10#1  | 91.44(12)  | O5#1-Co3-N1    | 93.77(12) |
| O9-Co2-N3     | 92.39(12)  | O5#1-Co3-N1#1  | 95.40(13) |

Complex 3 Symmetry code for #1 1-x, 1-y, 2-z

| Bond Distance |           |             |            |        |          |
|---------------|-----------|-------------|------------|--------|----------|
| Co1-O4        | 2.009(2)  | Co1-O7      | 2.062(2)   | Co1-N2 | 2.041(3) |
| Co1-O6        | 2.341(3)  | Co1-O7#1    | 2.389(2)   | Co1-N4 | 2.067(3) |
| Bond Angles   |           |             |            |        |          |
| O6-Co1-O7     | 59.30(9)  | O4-Co1-O7   | 98.92(10)  |        |          |
| O6-Co1-O7#1   | 96.41(9)  | O4-Co1-O7#1 | 85.52(9)   |        |          |
| O6-Co1-N2     | 90.43(10) | O4-Co1-N2   | 113.08(10) |        |          |
| O6-Co1-N4     | 85.59(11) | O4-Co1-N4   | 89.87(11)  |        |          |

Complex 4 Symmetry code for #1 0.5+x, 0.5-y, -0.25+z ; #2 0.5-x, -0.5+y, 0.25+z

| Bond Distance |           |             |            |          |          |
|---------------|-----------|-------------|------------|----------|----------|
| Co1-O1        | 2.134(3)  | Co1-O4#1    | 2.042(3)   | Co2-O5#2 | 2.059(3) |
| Co1-O2        | 2.137(3)  | Co1-O5      | 2.261(2)   | Co2-O6   | 2.019(3) |
| Co1-O3        | 2.074(3)  | Co2-O2      | 2.263(3)   | Co2-O8   | 2.084(3) |
| Co1-O4        | 2.031(3)  | Co2-O4      | 2.114(2)   | Co2-N1   | 2.105(3) |
| Bond Angles   |           |             |            |          |          |
| O2-Co1-O1     | 96.56(10) | O4-Co2-O2   | 74.35(10)  |          |          |
| O2-Co1-O4     | 78.83(10) | O4-Co2-O5#2 | 82.83(10)  |          |          |
| O2-Co1-O4#1   | 96.92(10) | O4-Co2-O6   | 98.45(10)  |          |          |
| O2-Co1-O5     | 84.09(10) | O4-Co2-O8   | 87.36(10)  |          |          |
| O3-Co1-O1     | 95.97(11) | N1-Co2-O2   | 102.54(11) |          |          |
| O3-Co1-O4     | 89.81(11) | N1-Co2-O5#2 | 94.70(12)  |          |          |
| O3-Co1-O4#1   | 92.98(10) | N1-Co2-O6   | 83.36(13)  |          |          |
| O3-Co1-O5     | 85.19(10) | N1-Co2-O8   | 95.66(12)  |          |          |

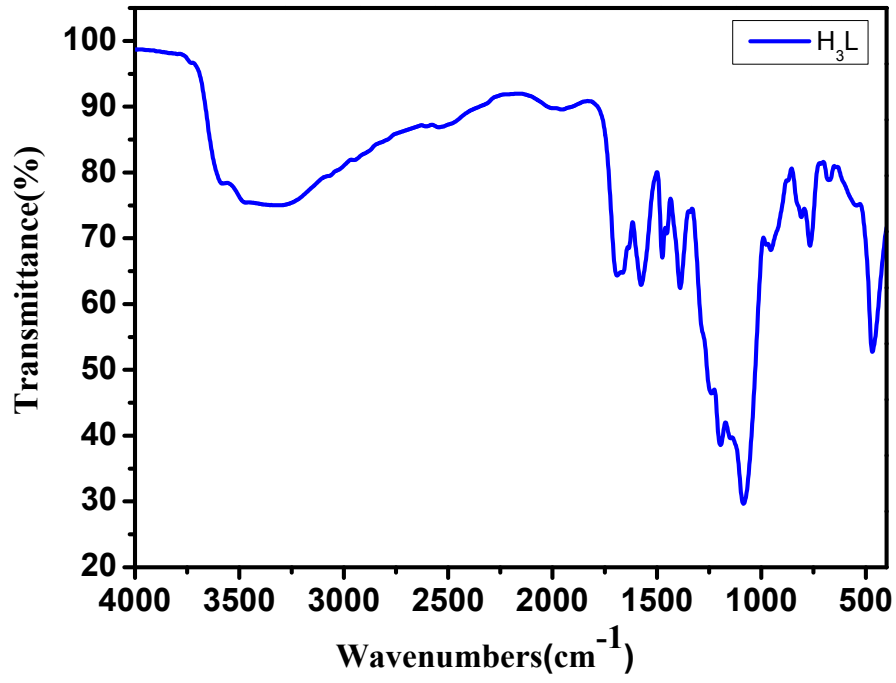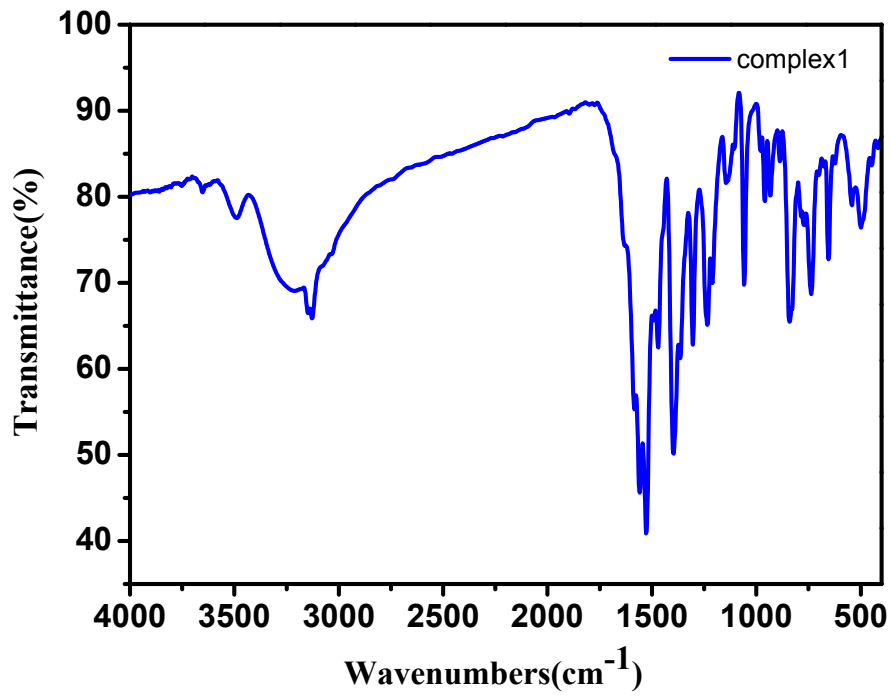

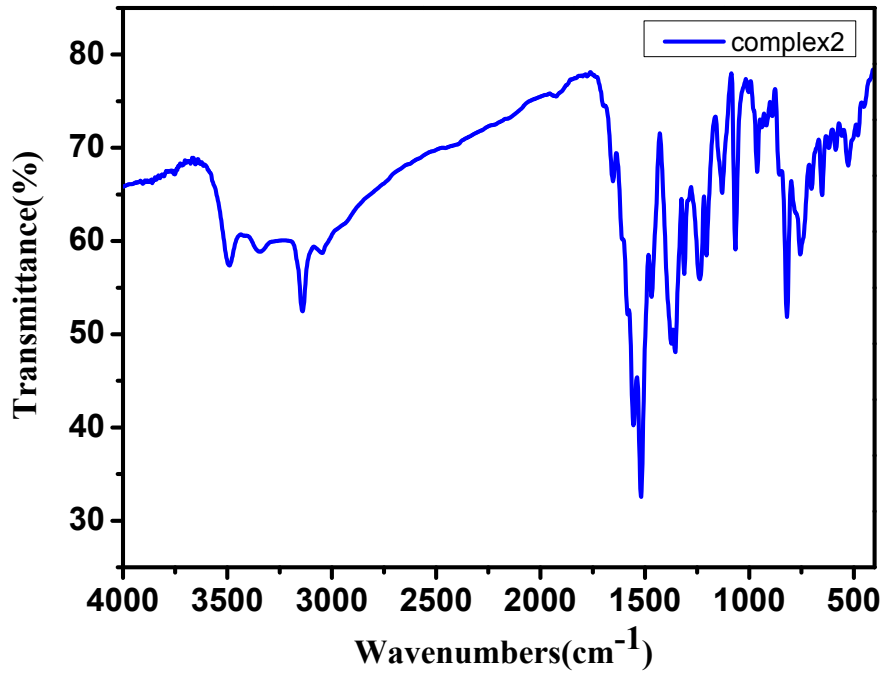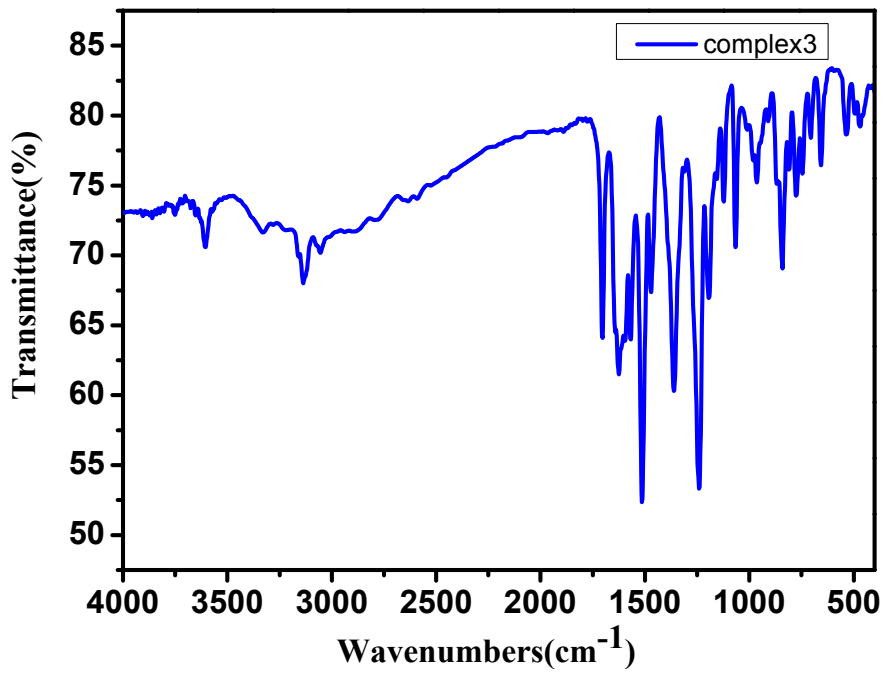

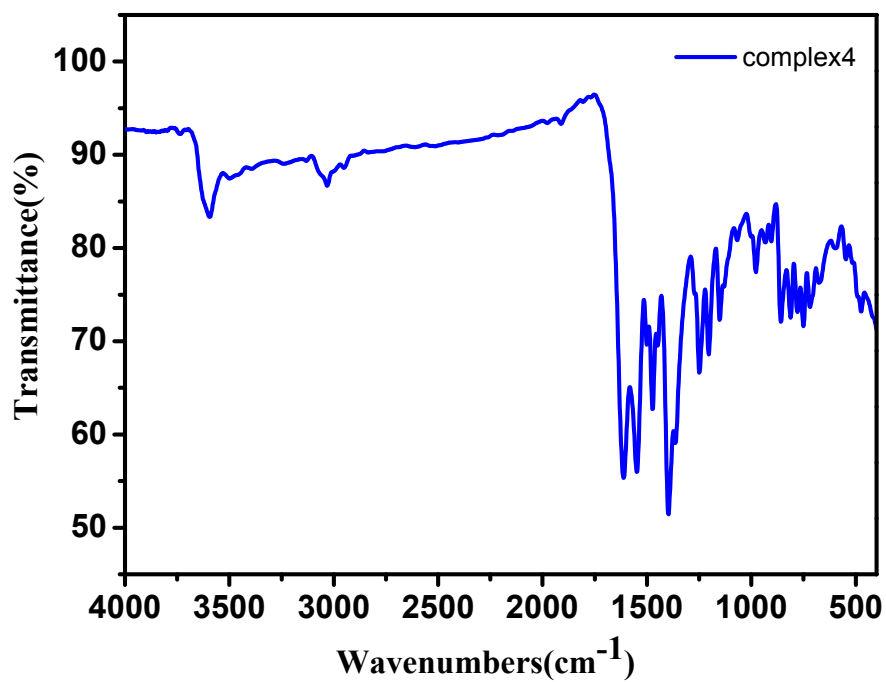

Figure. S1: IR of ligand H<sub>3</sub>L and complexes 1 - 4.

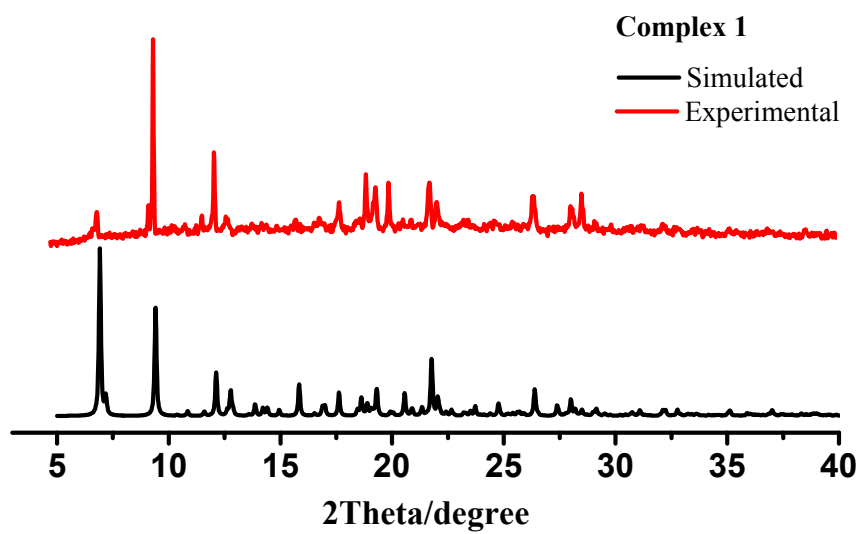

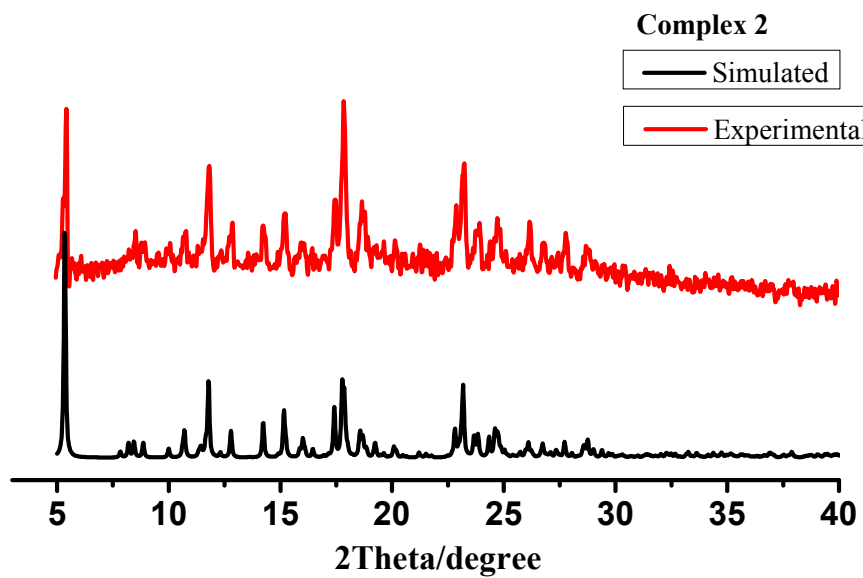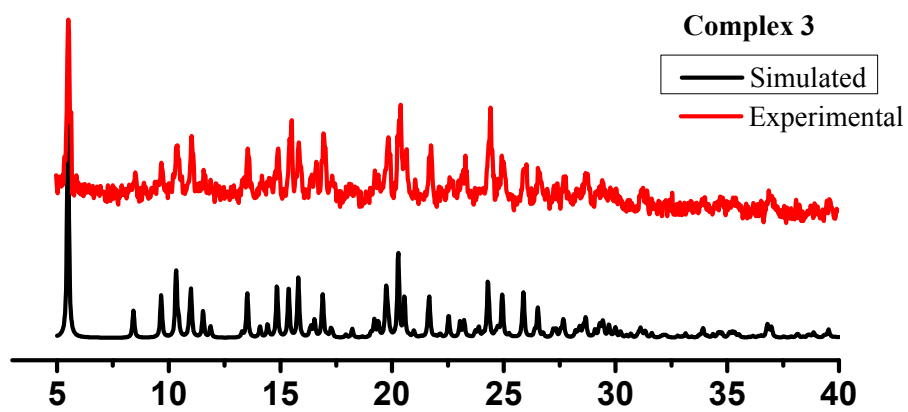

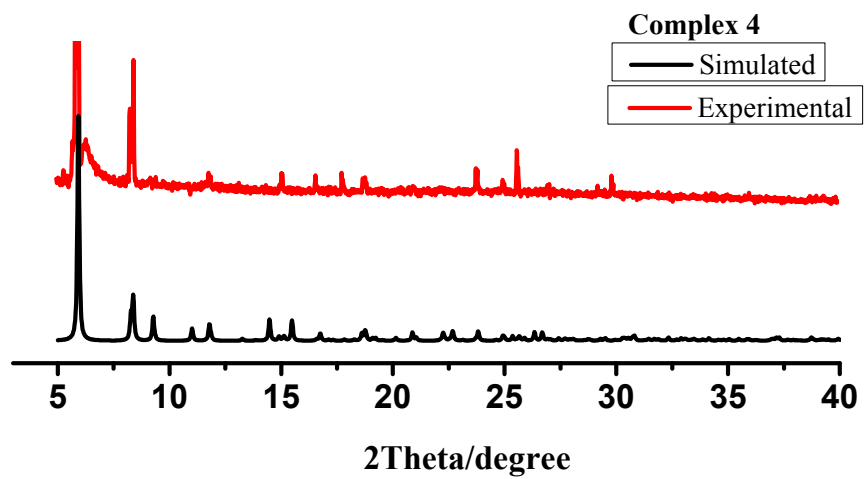

Figure S2. Simulated and observed PXRD patterns of complexes 1 - 4.

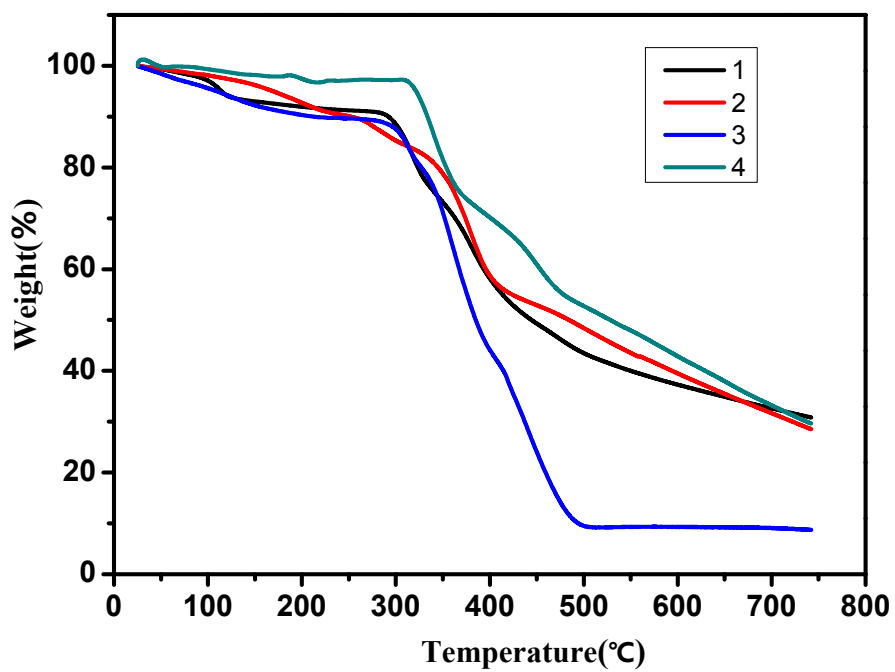

Figure S3. TGA of complexes 1 - 4.
